# Supplementary material for: Preparation of a low-temperature, thermally insulating, and flexible sensing hydrogel using hemp-derived high-charge nanocellulose
Source: Royal Society of Chemistry journal article supplement (doi:10.1039/d5nj04464b), 2026-01-01
Supplement: d5nj04464b2.pdf [file d5nj04464b2.pdf]

1 **Preparation of a Low-Temperature, Thermally Insulating,**  
2 **and Flexible Sensing Hydrogel Using Hemp-Derived High-**  
3 **Charge Nanocellulose**

4 Wei Chen<sup>1</sup>, Zheng Li<sup>1</sup>, Fangxin Zou<sup>1</sup>, Jingtong Yu<sup>1</sup>, Chenming Li<sup>2</sup>, Xin Zhang<sup>1\*</sup>, Jing Guo<sup>1\*</sup>

5 1. School of Textile and Material Technology, Dalian Polytechnic University, Dalian 116034, China;

6 2. Quartermaster Engineering Technology Research Department, Systems Engineering Institute, Academy of Military  
7 Science s, People's Liberation Army

8 \*E-mail address: [zhangxin\\_9119@163.com](mailto:zhangxin_9119@163.com) (Xin Zhang), [guojing8161@163.com](mailto:guojing8161@163.com) (Jing Guo)

9

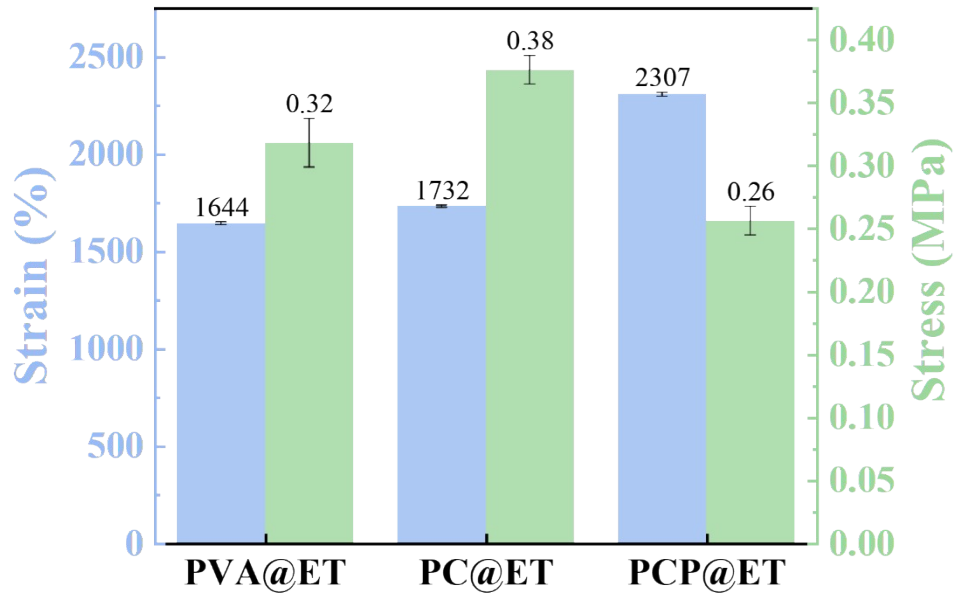

10

11 Figure S1 The average values and error values of stress-strain curves for PVA@ET,  
 12 PC@ET, and PCP@ET during 5 stretching processes

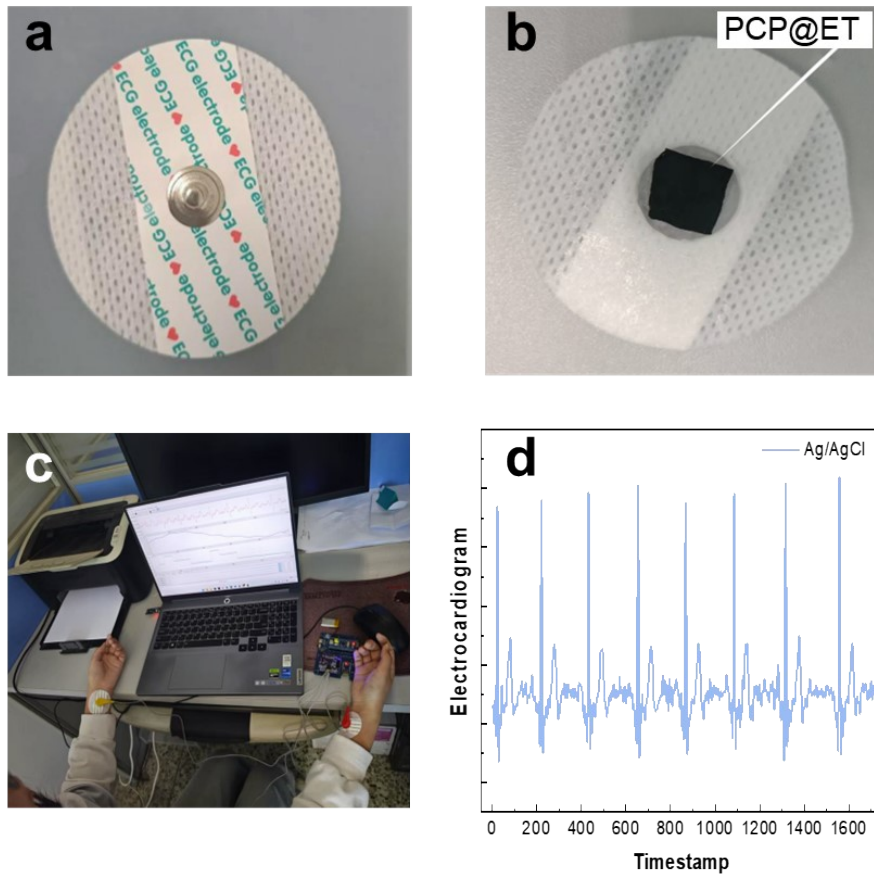

13

14 Figure S2 (a) the circuit-connection side; (b) the skin-contact side; (c) the ECG testing

15 process with the subject remaining stationary; and (d) the ECG waveform obtained  
16 using standard clinical Ag/AgCl electrodes under identical conditions.

17 Figure S2 illustrates the structure of the hydrogel electrode used in this study and  
18 the electrocardiogram (ECG) testing setup. Figure S2a is the circuit-connection side of  
19 the electrode, featuring connection terminals such as metal snaps or sockets, which  
20 interface with the ECG lead wires to transmit and record cardiac electrical signals.  
21 Figure S2b is the skin-contact side of the electrode, coated with conductive gel to reduce  
22 skin impedance, enhance electrical conductivity, and ensure stable adhesion to the skin  
23 for accurate bio-signal acquisition. Figure S2c is Static ECG testing scenario:  
24 experiments were conducted in a quiet, temperature-controlled (25 °C) room.  
25 Electrodes were attached to the skin following a standard lead configuration, ensuring  
26 firm, bubble-free contact while the subject remained at rest. Figure S2d is ECG  
27 waveform obtained under identical conditions using standard clinical Ag/AgCl  
28 electrodes, provided as a reference for comparison.

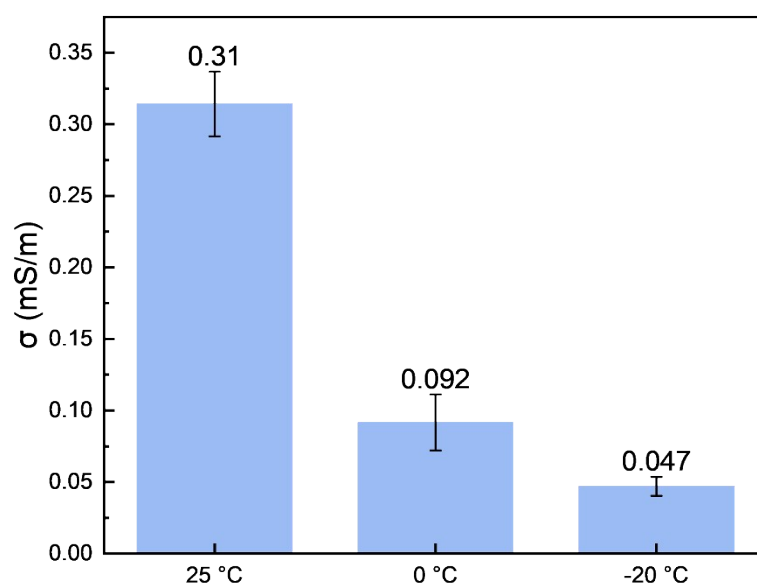

30 Figure S3 Conductivity ( $\sigma$ ) of the PCP@ET hydrogel at 25, 0, and  $-20^{\circ}\text{C}$ .

31       The conductivity ( $\sigma$ ) of PCP@ET was evaluated across a temperature range from  
32  $25^{\circ}\text{C}$  to  $-20^{\circ}\text{C}$ . Samples were equilibrated in a temperature-controlled chamber for  
33 24 h at each target temperature (25, 0, and  $-20^{\circ}\text{C}$ ). The electrical resistance was  
34 measured five times per condition using a digital multimeter, and the average value was  
35 used to calculate conductivity. The resulting conductivities were 0.31 mS/m at  $25^{\circ}\text{C}$ ,  
36 0.0921 mS/m at  $0^{\circ}\text{C}$ , and 0.0471 mS/m at  $-20^{\circ}\text{C}$ .
